# Supplementary material for: P2RX7 in Dopaminergic Neurons of Ventral Periaqueductal Gray Mediates HTWP Acupuncture-Induced Consciousness in Traumatic Brain Injury
Source: PubMed Central journal article supplement (PMC7838360; doi:10.3389/fncel.2020.598198), 2021-01-13
Supplement: Table_1.pdf [file Table_1.pdf]

**P2RX7 in dopaminergic neurons of the ventral periaqueductal gray mediates HTWP acupuncture-induced consciousness in traumatic brain injury**

Huiling Tang<sup>1, #</sup>, Siru Qin<sup>1, #</sup>, Wei Li<sup>1, #</sup>, Xuyi Chen<sup>2</sup>, Luis Ulloa<sup>3</sup>, Qiumei Zhu<sup>4</sup>, Baohu Liu<sup>5</sup>, Yinan Gong<sup>1</sup>, Yadan Zhao<sup>1</sup>, Songtao Wang<sup>1</sup>, Shanshan Li<sup>1</sup>, Yongming Guo<sup>1,6</sup>, Yi Guo<sup>1,7, \*</sup>, Zhifang Xu<sup>1,6, \*</sup>

**Supplemental Table 1. The gene-specific primers used in this study**

| Gene           | Forward primer (5'→3') | Reverse primer (5'→3') | Product size |
|----------------|------------------------|------------------------|--------------|
| <i>Actb</i>    | CCTTCCTGGGTATGGAATCCTG | CTTCTGCATCCTGTCAGCAATG | 152          |
| <i>P2rx3</i>   | TGAAGGGTACTGCGTCAACC   | CATGGAACCCTGGGAAGAGG   | 120          |
| <i>P2rx7</i>   | CTTGGAACCCTCAGTGTCCC   | CCAGGTTGCAGTCCCAGTAG   | 126          |
| <i>Trpv1</i>   | AGATCCATGAACCCGAGTGC   | CGATCACCTCCAGAACCGAG   | 132          |
| <i>Tacr1</i>   | ATGGACTCTGATCTCTTCCCCA | TCCATATCACCCTACGTTGCC  | 148          |
| <i>Cacna1d</i> | TCTGTGTTCCGGTGTGTACG   | AGAGCAGCAACAGCAGAGAG   | 127          |
| <i>Drd3</i>    | GTCTGAGGCTGCATCCCATT   | GCTGCAGGTGTGACAAAAGG   | 135          |
| <i>Exoc1</i>   | TGCCATCAAAGAGAGCCCTG   | CCAGGTGCAGGAGATGAAGG   | 103          |
| <i>Exoc3l1</i> | ACCGAAGCCGTGAAGTACAG   | CTGTCTCAGGGCTTCTCGTG   | 149          |
| <i>Fgr</i>     | AGCTTCTCTCCGATGGCAAC   | ATGTGGTCGCCTCTGTTCTG   | 115          |
| <i>Fgb</i>     | AAAACGGAGGATGGACGGTC   | CAATATTCGCCTGGCAAGCC   | 145          |

**Supplemental Table 2. Co-expression of differentially expressed genes among sham group, TBI group and acupuncture group**

| GeneSymbol   | sham VS TBI  | TBI VS Acu   |
|--------------|--------------|--------------|
|              | Foldchange   | Foldchange   |
| LOC102554819 | +25.10896545 | -20.35582364 |
| Dguok        | +23.59157331 | -25.39890233 |
| Kcnn3        | +14.06372158 | -2.575019771 |
| Rab17        | +12.7407397  | -8.269854687 |
| Klk1c8 ///   |              |              |
| LOC100911764 | +12.65752186 | -3.310581445 |
| Bank1        | +9.290566639 | -2.862524323 |
| Grm8         | +4.768353525 | -2.745858439 |
| Reg3a        | +4.701432188 | -3.534222152 |
| LOC102553732 | +4.701356064 | -2.558798954 |
| Spam1        | +4.575485814 | -3.895508788 |
| Mx2          | +3.791177326 | -9.124215883 |
| Usp49        | +3.631270441 | -7.766938254 |
| Slco1a1      | +3.455499897 | -2.255844213 |
| Ccl7         | +3.360354833 | -2.280647047 |
| Reg3b        | +3.049109204 | -2.981717037 |
| Mab21l2      | +3.024504101 | -2.340734216 |
| Cenpn        | +2.992187437 | -2.755892521 |
| Gpat2        | +2.884098936 | -5.854101852 |
| Zbtb40       | +2.851929223 | -2.334138451 |
| Ifrd2        | +2.825332028 | -2.206867285 |
| Chit1        | +2.704120957 | -2.971875163 |
| Comp         | +2.65502853  | -2.233618588 |
| Kctd16       | +2.508820147 | -2.885717553 |
| Parpbb       | +2.492197407 | -2.220176186 |

---

|                       |              |              |
|-----------------------|--------------|--------------|
| Fga                   | +2.458768465 | -3.583778955 |
| LOC100910650          | +2.434198274 | -2.091065801 |
| Chrm2                 | +2.427457365 | -2.667836438 |
| Scnn1g                | +2.393094239 | -2.327378221 |
| Il27ra                | +2.389911572 | -2.8249272   |
| Imp21                 | +2.350356742 | -2.611982974 |
| Fancc                 | +2.318632703 | -2.648010867 |
| Pcsk9                 | +2.273592176 | -2.393986819 |
| Fam26f                | +2.267059995 | -2.302601266 |
| Fbln1                 | +2.261857497 | -2.126752659 |
| Fas                   | +2.227119627 | -2.036580925 |
| Pax8                  | +2.220091781 | -2.316939585 |
| Vnn1                  | +2.157482856 | -12.47739629 |
| Pomc                  | +2.155464616 | -2.031607768 |
| Myh6                  | +2.150480031 | -2.132029973 |
| Cd93                  | +2.111015531 | -2.230232785 |
| Klrb1a /// RGD2301395 | +2.073757171 | -2.412962106 |
| Fev                   | +2.010602469 | -5.084489341 |
| Kcnj12                | -2.003283561 | +2.963446491 |
| Crh                   | -2.190490813 | +2.615185502 |
| Nphp4                 | -2.236131393 | +2.491737299 |
| Dio2                  | -2.236488388 | +3.286194759 |
| Dlx5                  | -2.283089884 | +2.889601933 |
| Pou3f1                | -2.289146205 | +2.163309291 |
| Foxg1                 | -2.364778907 | +4.38898578  |
| Rpe65                 | -2.407339867 | +2.292191631 |
| Iqck                  | -2.424835434 | +3.226211922 |
| Iba57 ///             |              |              |
| LOC100912081          | -2.658877214 | +2.274905945 |

|                         |              |              |
|-------------------------|--------------|--------------|
| LOC102547720            | -2.698719582 | +2.288774379 |
| Zfp488                  | -2.747191732 | +2.218958849 |
| Agap3                   | -2.822726484 | +2.320671803 |
| Cklf                    | -2.865370194 | +13.06871316 |
| Slc6a13                 | -3.017458854 | +2.213886875 |
| LOC100910851 ///        |              |              |
| LOC100911797 ///        |              |              |
| Spink5                  | -3.126972593 | +2.795936859 |
| Atp2a2                  | -3.405450841 | +5.174499752 |
| Sim1                    | -3.921846947 | +3.713953601 |
| Pstpip1                 | -4.259145112 | +4.190862719 |
| LOC688090 ///<br>RT1-Bb | -5.102074848 | +4.814521551 |
| Slc10a2                 | -8.095956628 | +9.478111954 |
| LOC102549282            | -11.05961031 | +4.447115294 |
| Aqp6                    | -14.02835445 | +5.711655521 |

---
